# Supplementary material for: Mathematical models for cytarabine-derived myelosuppression in acute myeloid leukaemia
Source: PLOS journal article supplement (doi:10.1371/journal.pone.0204540), 2019-07-01
Supplement: S6 (10.1371/journal.pone.0204540.s006) [file journal.pone.0204540.s006]

**S2 Table. Comparison of model predictions for low-dose treatment schedules.**

| Model | Group  | nadir    |           |          |           |
|-------|--------|----------|-----------|----------|-----------|
|       |        | D1-5 100 |           | D1-5 400 |           |
| M1    | 35 PMs | 1.6      | $\pm 0.8$ | 0.3      | $\pm 0.2$ |
|       |        | (0.0     | 3.6)      | (0.0     | 0.8)      |
| M2    | 35 PMs | 1.7      | $\pm 0.8$ | 0.3      | $\pm 0.2$ |
|       |        | (0.5     | 3.7)      | (0.1     | 1.0)      |
| M3    | 35 PMs | 1.8      | $\pm 0.9$ | 0.4      | $\pm 0.2$ |
|       |        | (0.8     | 4.3)      | (0.2     | 1.1)      |
| M4    | 35 PMs | 1.7      | $\pm 1.0$ | 0.4      | $\pm 0.2$ |
|       |        | (0.8     | 4.9)      | (0.2     | 1.1)      |
| M5    | 35 PMs | 1.7      | $\pm 1.1$ | 0.4      | $\pm 0.2$ |
|       |        | (0.7     | 5.5)      | (0.2     | 1.0)      |
| M6    | 35 PMs | 1.5      | $\pm 1.1$ | 0.4      | $\pm 0.3$ |
|       |        | (0.9     | 5.9)      | (0.2     | 1.2)      |
| M7    | 35 PMs | 0.5      | $\pm 0.5$ | 0.1      | $\pm 0.3$ |
|       |        | (0.1     | 3.4)      | (0.0     | 1.0)      |
| M8    | 35 PMs | 0.1      | $\pm 0.1$ | 0.1      | $\pm 0.1$ |
|       |        | (0.0     | 0.4)      | (0.0     | 0.4)      |
| M9    | 35 PMs | 0.7      | $\pm 0.4$ | 0.2      | $\pm 0.1$ |
|       |        | (0.1     | 1.6)      | (0.0     | 0.5)      |
| M10   | 35 PMs | 2.1      | $\pm 1.3$ | 0.6      | $\pm 0.4$ |
|       |        | (0.6     | 5.8)      | (0.1     | 1.8)      |
| M11   | 35 PMs | 1.6      | $\pm 1.1$ | 0.4      | $\pm 0.2$ |
|       |        | (0.9     | 5.5)      | (0.2     | 1.0)      |
| M12   | 35 PMs | 2.4      | $\pm 1.2$ | 0.7      | $\pm 0.5$ |
|       |        | (0.8     | 5.8)      | (0.1     | 2.1)      |

As in Table 4, predicted *nadir* values for different treatment schedules are shown, based on underlying mathematical models M1–M12. Shown are the values of median, standard deviation, minimum and maximum (in brackets) for two low-dose schedules. Both assume a continuous infusion throughout days 1 to 5, with either 100  $mg/m^2$  or 400  $mg/m^2$  Ara-C per day. No clinical observations are available to compare these predictions, but they give additional insight on the possibility to discriminate models M1–M12 and a general trend showing that for 100  $mg/m^2$  per day despite of M7-M9 almost all nadir values are above 1  $G/L$ . The nadir values for the low-dose infusion with 400  $mg/m^2$  Ara-C per day are in the same range compared to the results of the high-dose schedules (Two further personalised cycles were excluded because for some models no recovery after chemotherapy was observed). The simulated nadirs above 1  $G/L$  for the low-dose schedule (100  $mg/m^2$ ) reflect the lower toxic effects represented by required hospitalisation due to fever and neutropenia and platelet transfusions compared to the low-dose (400  $mg/m^2$ ) and high-dose schedules explored in [3]. As M7-M9 are not able to reflect the lower toxic effects through higher nadir values, the simulation study serves as an indicator that the secondary effect of Ara-C may not be an Ara-C induced reduction of the transition rate.
